# Supplementary material for: Extending the timescale of molecular simulations by using time–temperature superposition: rheology of ionic liquids
Source: Royal Society of Chemistry journal article supplement (doi:10.1039/d1sm00701g), 2021-01-01
Supplement: d1sm00701g1.pdf [file d1sm00701g1.pdf]

**Supporting Information for: Extending Timescale of Molecular Simulations by Using  
Time-Temperature Superposition: Rheology of Ionic Liquids**

Adegbola Balogun<sup>1</sup>, Daria Lazarenko<sup>2</sup>, Fardin Khabaz<sup>2, 3\*</sup>, and Rajesh Khare<sup>1\*</sup>

<sup>1</sup>Department of Chemical Engineering, Texas Tech University,  
Lubbock, TX 79409

<sup>2</sup>School of Polymer Science and Polymer Engineering, The University of Akron,  
Akron, OH 44325

<sup>3</sup>Department of Chemical, Biomolecular, and Corrosion Engineering, University of Akron,  
Akron, OH 44325

\*Corresponding authors email: [fardin.khabaz@uakron.edu](mailto:fardin.khabaz@uakron.edu) and [rajesh.khare@ttu.edu](mailto:rajesh.khare@ttu.edu)

**Table of Contents**

**Table S1:** Simulation run information of the steady shear for viscosity calculation

**Table S2:** Simulation run information of the oscillatory shear for moduli calculation

**Table S3:** Zero shear viscosity at different temperatures

**Figure S1:** Master curve of the phase angle values

**Figure S2:** Master curve of the moduli data using the same shift factors obtained from the MSD master curves

**Table S1:** Simulation run information of the steady shear for viscosity calculation.

| Shear rate, $\dot{\gamma}$ ( $\text{s}^{-1}$ ) | Simulation run time (ns) |
|------------------------------------------------|--------------------------|
| $5 \times 10^6$                                | 40                       |
| $7 \times 10^6$                                | 40                       |
| $1 \times 10^7$                                | 40                       |
| $1.5 \times 10^7$                              | 40                       |
| $2.5 \times 10^7$                              | 10                       |
| $5 \times 10^7$                                | 10                       |
| $1 \times 10^8$                                | 10                       |
| $2.5 \times 10^8$                              | 10                       |
| $1 \times 10^9$                                | 10                       |
| $1 \times 10^{10}$                             | 10                       |
| $5 \times 10^{10}$                             | 10                       |
| $1 \times 10^{11}$                             | 10                       |

**Table S2:** Simulation run information of the oscillatory shear for moduli calculation.

| Frequency, $\omega$ ( $\text{rad s}^{-1}$ ) | Number of oscillations | simulation run time (ns) |
|---------------------------------------------|------------------------|--------------------------|
| $2 \times 10^9$                             | 24                     | 72                       |
| $5 \times 10^9$                             | 70                     | 84                       |
| $1 \times 10^{10}$                          | 120                    | 72                       |
| $2 \times 10^{10}$                          | 120                    | 36                       |
| $5 \times 10^{10}$                          | 120                    | 14.4                     |
| $1 \times 10^{11}$                          | 120                    | 7.2                      |

**Table S3:** Zero shear viscosity at different temperatures

| Temperature (K) | Zero shear viscosity, $\eta_o$ (Pa s) |
|-----------------|---------------------------------------|
| 300             | $0.7729 \pm 0.0428$                   |
| 340             | $0.0720 \pm 0.0014$                   |
| 380             | $0.0171 \pm 0.0004$                   |
| 420             | $0.0070 \pm 0.0008$                   |
| 460             | $0.0038 \pm 0.0004$                   |

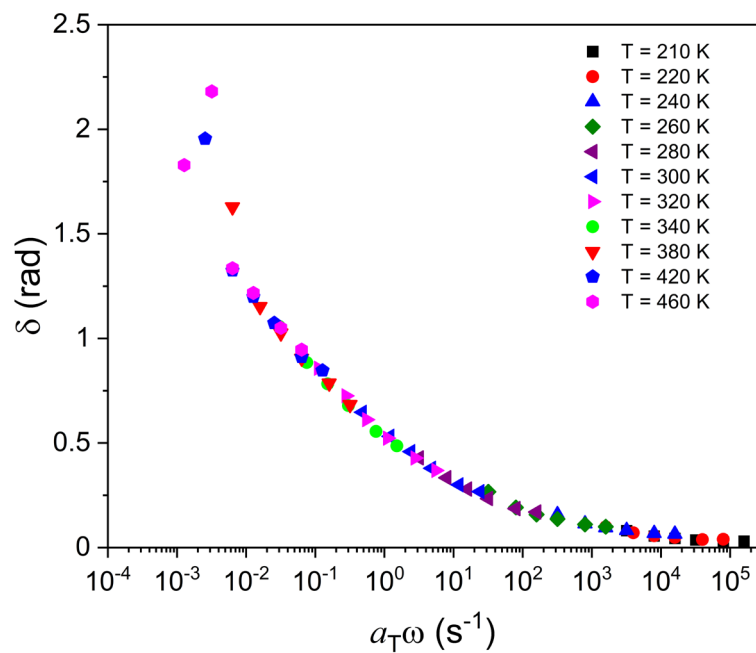

**Fig. S1** Master curve of phase angle as a function of the rescaled frequency constructed at a reference temperature of 300 K.

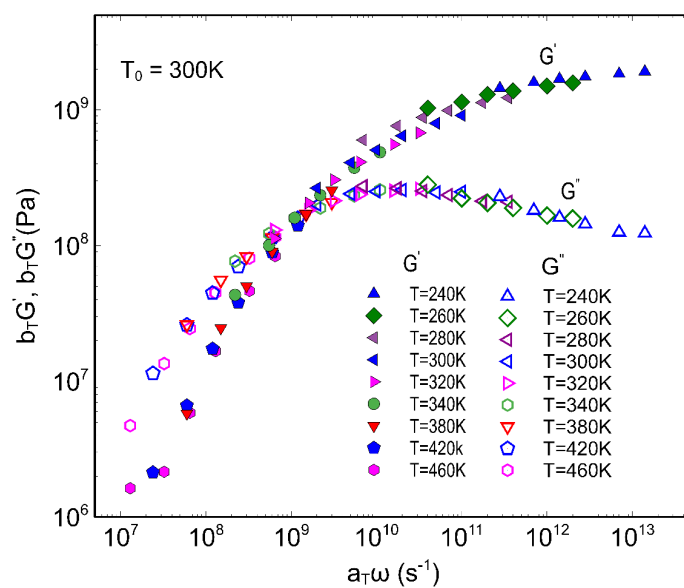

**Fig. S2** Master curve of the moduli data using the same shift factors obtained from the MSD master curves at a reference temperature of 300 K.
